# Supplementary material for: A two-dimensional robust topological insulator with coexisting ferroelectric and valley polarization
Source: Royal Society of Chemistry journal article supplement (doi:10.1039/c8tc06252h), 2019-01-01
Supplement: c8tc06252h1.pdf [file c8tc06252h1.pdf]

## Supplementary Information

### Two-dimensional robust topological insulator with coexisting ferroelectric and valley polarization

Xing-kai Hu, Zhao-xia Pang, Chang-wen Zhang, Pei-ji Wang, Ping Li, Wei-xiao Ji\*

Spintronic institute & School of Physics and Technology, University of Jinan, Jinan, Shandong, 250022, People's Republic of China

#### Computational details on $Z_2$ topological invariant

The topological  $Z_2$  invariant is confirmed by using the method which uses the Wilson loop methods<sup>1</sup> base on the  $U(2N)$  non-Abelian Berry connection by Yu et al<sup>2</sup>. In this method, each state of  $n$ -th occupied band is indexed by  $|n, k_x, k_y\rangle$ , and a square matrix  $F(k_x, k_y)$  containing the overlap integrals

$$[F(k_x, k_y)]_{mn} = \langle m, k_x, k_y | n, k_x, k_y \rangle \quad (1)$$

is defined. The complex unitary square matrix is calculated by

$$D(k_y) = \prod_{j=0}^{N_x-1} F(j\Delta k_x, k_y), \quad (2)$$

whose complex eigenvalues  $\lambda(k_y)$  have phase angle  $\theta$ . Here  $\Delta k_x = \frac{2\pi}{N_x a}$  is the discrete spacing of  $N_x$  points along  $k_x$  direction. The Wannier center evolutions  $\theta(k_y)$  of 3Fa is plotted in Figure 4(b), and the  $Z_2$  invariant can be obtained by counting the even or odd number of crossings of any arbitrary horizontal reference line.

---

\* Corresponding author: Wei-xiao Ji  
E-mail address: [hellojiweixiao@163.com](mailto:hellojiweixiao@163.com)

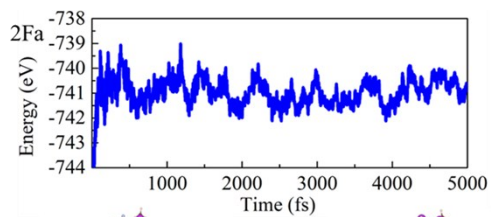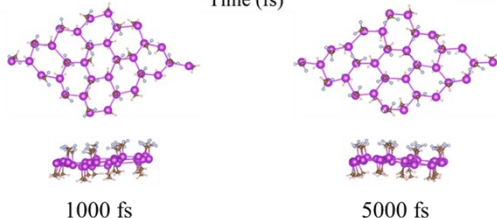

1000 fs

5000 fs

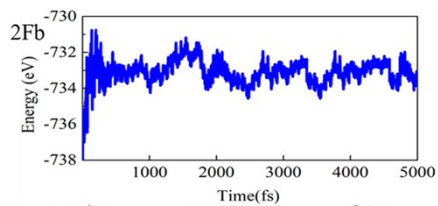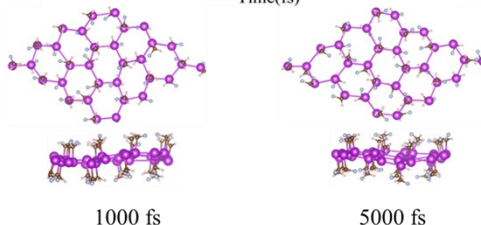

1000 fs

5000 fs

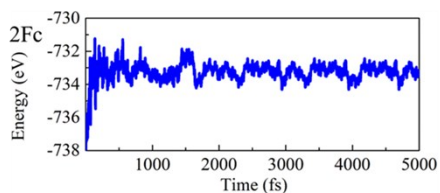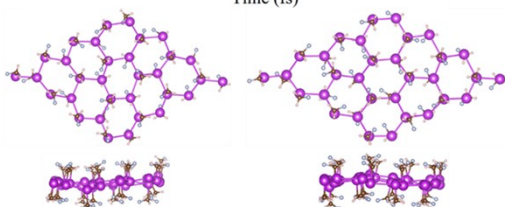

1000 fs

5000 fs

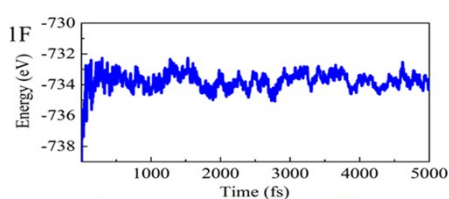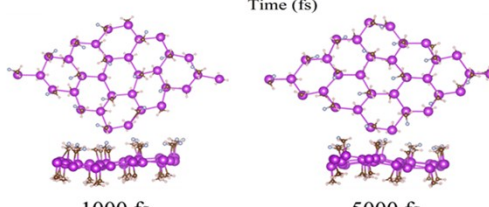

1000 fs

5000 fs

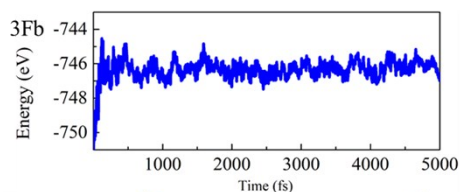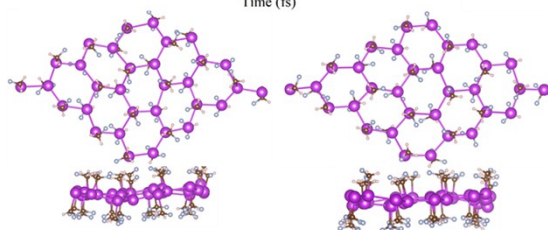

1000 fs

5000 fs

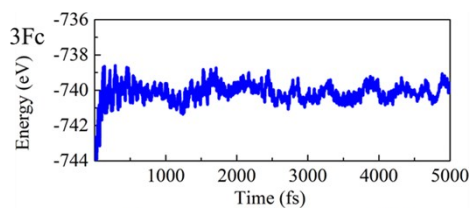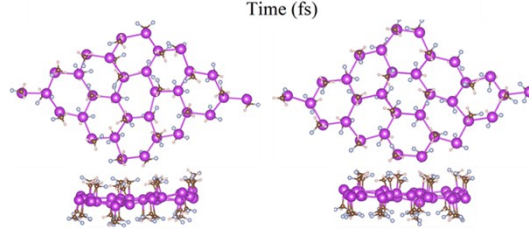

1000 fs

5000 fs

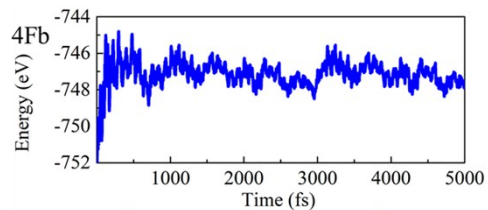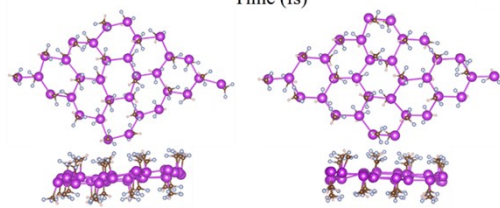

1000 fs

5000 fs

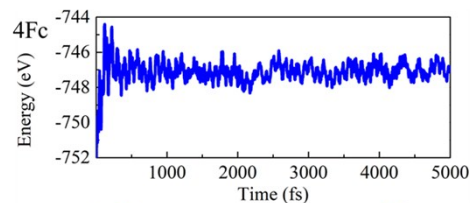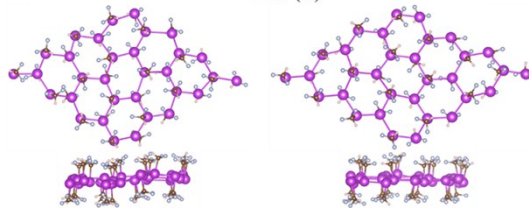

1000 fs

5000 fs

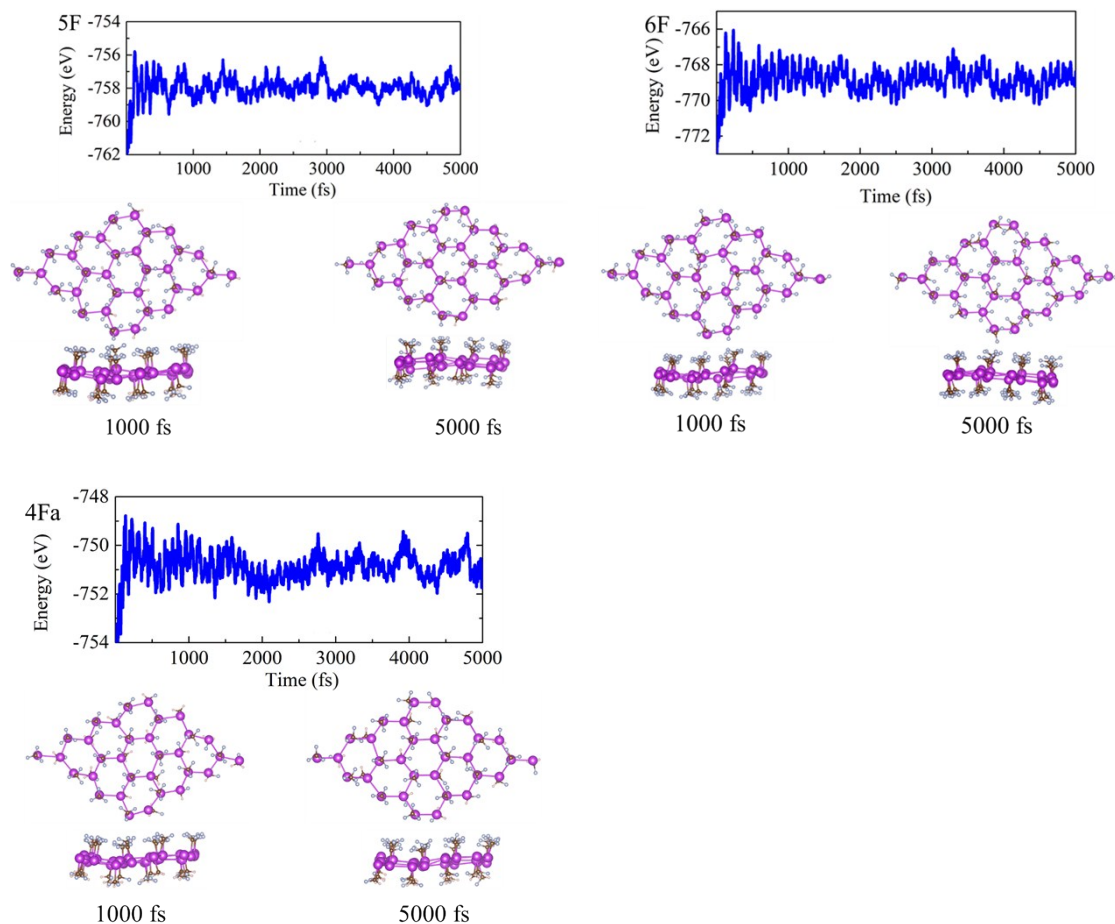

**Figure S1** Variation of energy with increasing time obtained from MD simulation at 300 K for  $\text{Bi}_2\text{C}_2\text{H}_{6-x}\text{F}_x$  films.

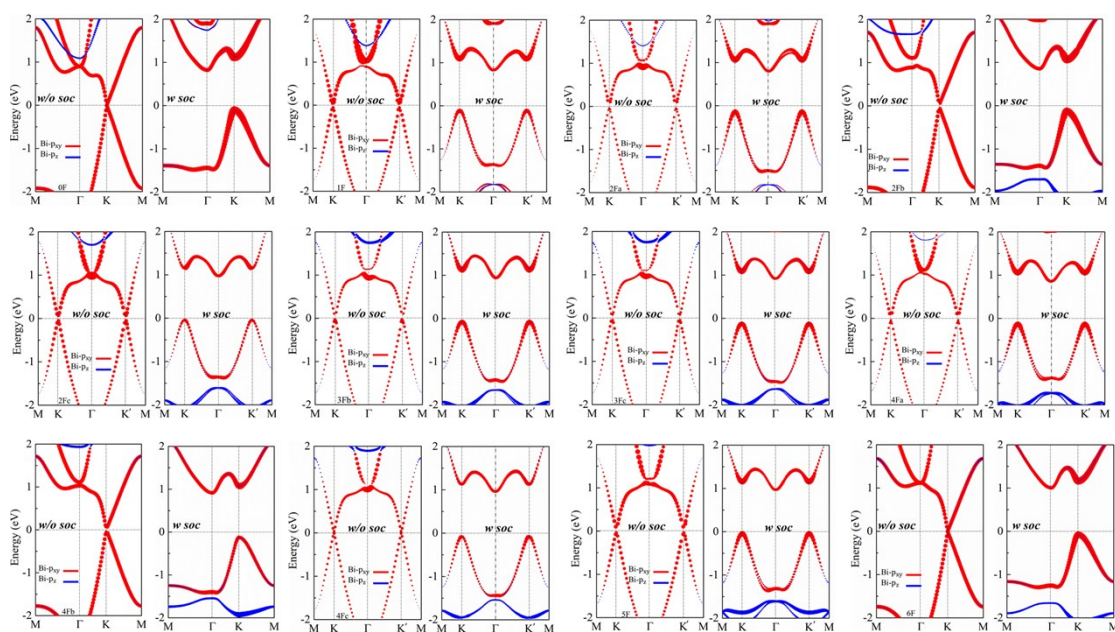

**Figure S2** Band structure of  $\text{Bi}_2\text{C}_2\text{H}_{6-x}\text{F}_x$  films monolayer without and with SOC. The blue, red dots present the weights of the Bi-  $p_{xy}$  and Bi-  $p_z$  character, respectively.

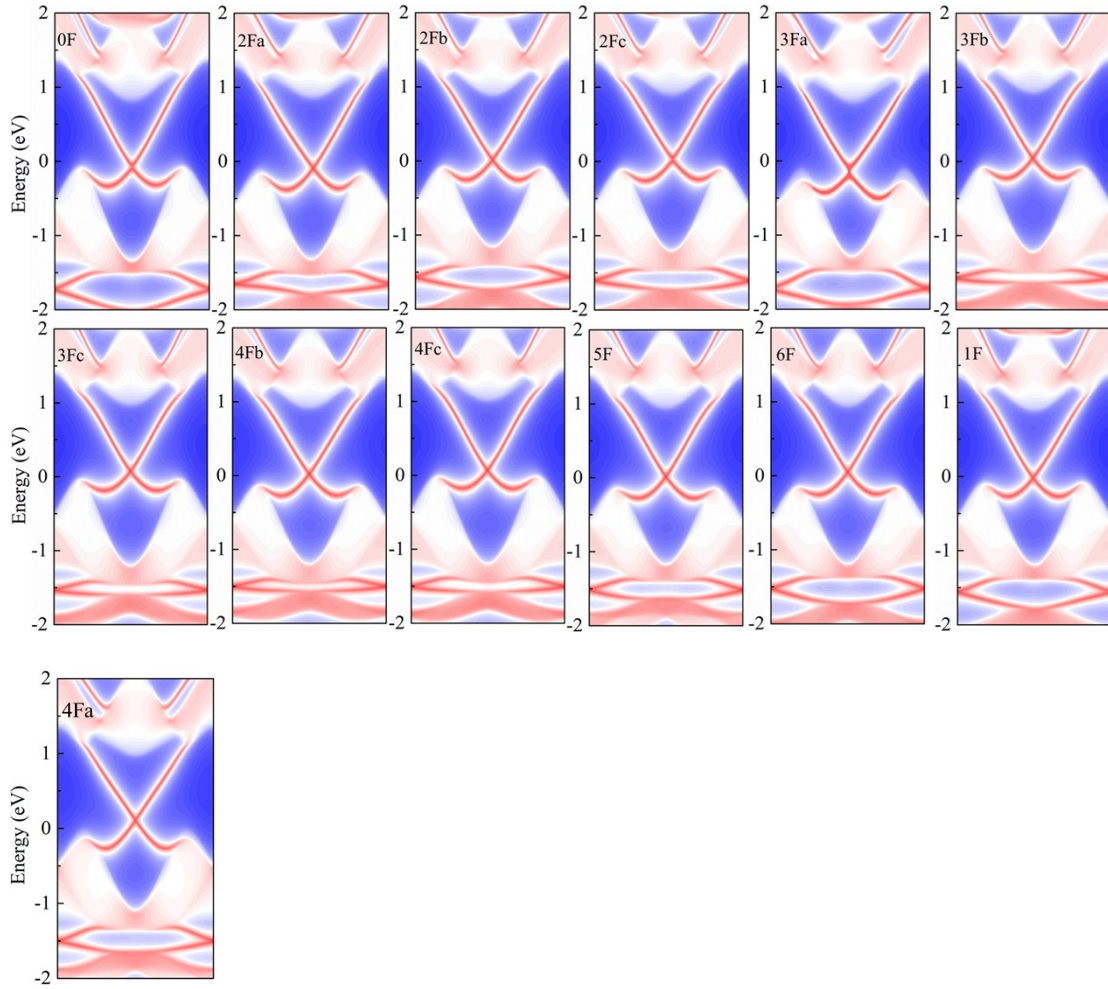

**Figure S3** Total edge density of states for  $\text{Bi}_2\text{C}_2\text{H}_{6-x}\text{F}_x$ . Evolutions of Wannier centers for  $\text{Bi}_2\text{C}_2\text{H}_6$   $x\text{F}_x$  along  $k_y$ .



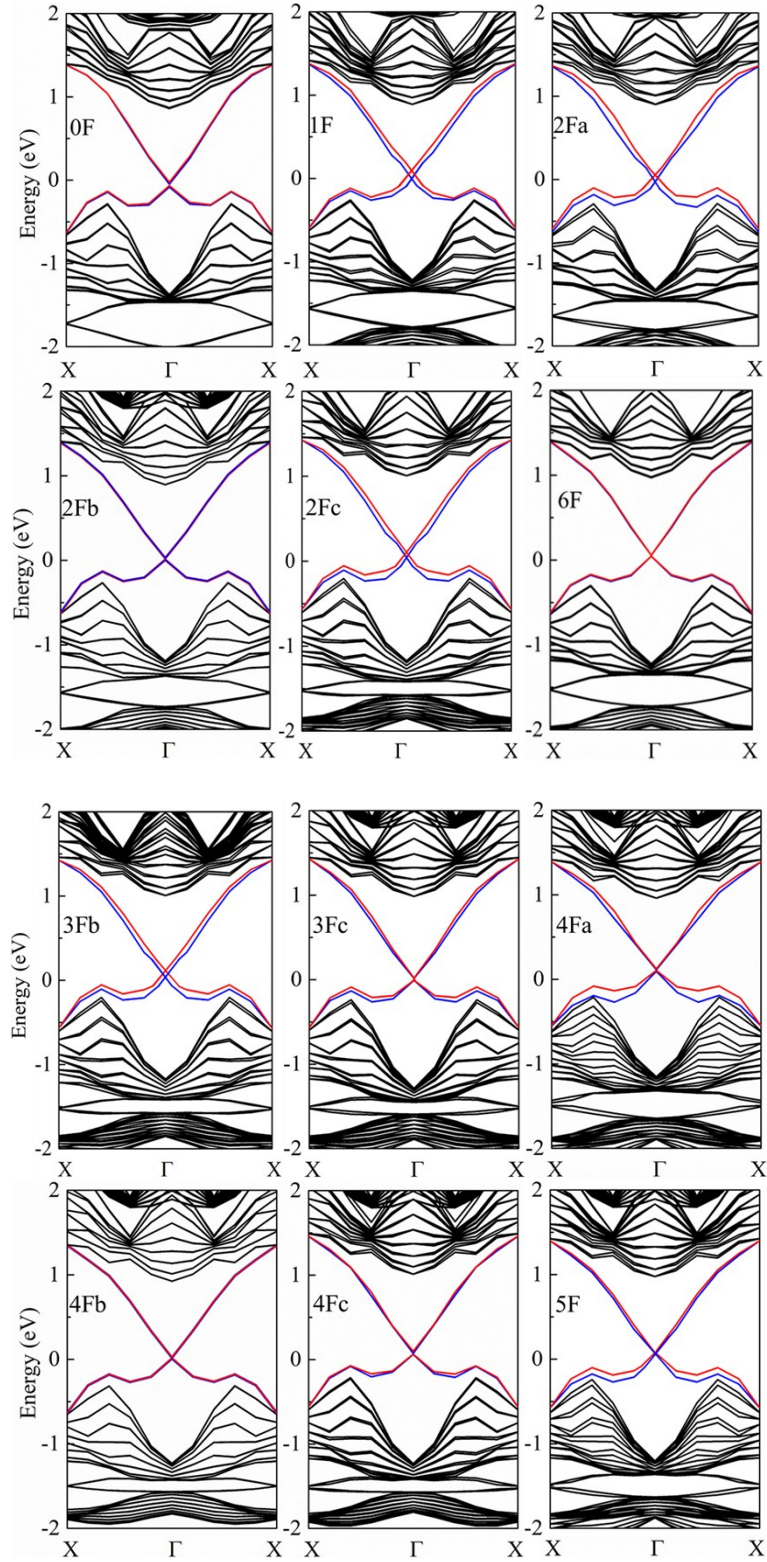

**Figure S4** The edge states. The red and blues lines correspond to the edge state from the right and left sides, respectively,

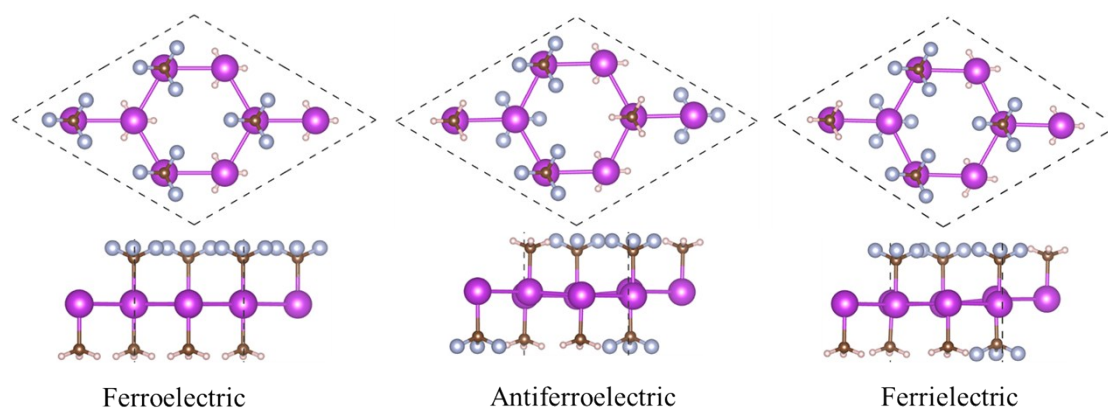

**Figure S5** Three structures of 3Fa, ferroelectric, antiferroelectric, ferrielectric.

**Table S1** The charge transfer situation of fluorination-methyl-functionalized bismuth ( $\text{Bi}_2\text{C}_2\text{H}_6$ - $\text{xF}_\text{x}$ ) films.

| atom (0F) | CHARGE | atom (1F) | CHARGE | atom (2Fa) | CHARGE |
|-----------|--------|-----------|--------|------------|--------|
| H         | 0.9327 | H         | 0.9044 | H          | 0.8854 |
| H         | 0.9327 | H         | 0.8657 | H          | 0.9438 |
| H         | 0.932  | H         | 0.9450 | H          | 0.9172 |
| H         | 0.932  | H         | 0.9162 | H          | 0.9204 |
| H         | 0.8870 | H         | 0.9096 | C          | 3.2093 |
| H         | 0.8870 | C         | 3.9003 | C          | 3.9003 |
| C         | 4.5534 | C         | 4.4759 | F          | 7.6257 |
| C         | 4.5534 | F         | 7.6416 | F          | 7.6268 |
| Bi        | 4.7077 | Bi        | 4.6854 | Bi         | 4.7185 |
| Bi        | 4.6821 | Bi        | 4.7558 | Bi         | 4.6368 |

  

| atom (2Fb) | CHARGE | atom (2Fc) | CHARGE | atom (3Fa) | CHARGE |
|------------|--------|------------|--------|------------|--------|
| H          | 0.8557 | H          | 0.9589 | H          | 0.9454 |
| H          | 0.8986 | H          | 1.0654 | H          | 0.9365 |
| H          | 0.9075 | H          | 1.0633 | H          | 0.9338 |

|    |        |    |        |    |        |
|----|--------|----|--------|----|--------|
| H  | 0.9220 | H  | 0.9738 | C  | 2.5268 |
| C  | 3.9189 | C  | 3.3827 | C  | 4.4495 |
| C  | 3.8436 | C  | 3.3717 | F  | 7.6131 |
| F  | 7.6408 | F  | 7.7812 | F  | 7.6167 |
| F  | 7.6411 | F  | 7.7783 | F  | 7.6204 |
| Bi | 4.7108 | Bi | 4.8218 | Bi | 4.7402 |
| Bi | 4.6612 | Bi | 4.8029 | Bi | 4.6176 |

---

| atom (3Fb) | CHARGE | atom (3Fc) | CHARGE | atom (4Fa) | CHARGE |
|------------|--------|------------|--------|------------|--------|
| H          | 0.8978 | H          | 0.9201 | H          | 0.8763 |
| H          | 0.8995 | H          | 0.9024 | H          | 0.8783 |
| H          | 0.8724 | H          | 0.8714 | C          | 2.5373 |
| C          | 3.2141 | C          | 3.2108 | C          | 3.8946 |
| C          | 3.8692 | C          | 3.8471 | F          | 7.6194 |
| F          | 7.6314 | F          | 7.6324 | F          | 7.6244 |
| F          | 7.6289 | F          | 7.6321 | F          | 7.6402 |
| F          | 7.6406 | F          | 7.6362 | F          | 7.6210 |
| Bi         | 4.6971 | Bi         | 4.6920 | Bi         | 4.6920 |
| Bi         | 4.6490 | Bi         | 4.6555 | Bi         | 4.6555 |

---

| atom (4Fb) | CHARGE | atom (4Fc) | CHARGE | atom (5F) | CHARGE |
|------------|--------|------------|--------|-----------|--------|
| H          | 0.8588 | H          | 0.8604 | H         | 0.8868 |
| H          | 0.8644 | H          | 0.8496 | C         | 2.5346 |

|    |        |    |        |    |        |
|----|--------|----|--------|----|--------|
| C  | 3.2292 | C  | 3.2384 | C  | 3.2187 |
| C  | 3.2417 | C  | 3.1981 | F  | 7.6180 |
| F  | 7.6328 | F  | 7.6297 | F  | 7.6190 |
| F  | 7.6282 | F  | 7.6314 | F  | 7.6263 |
| F  | 7.6271 | F  | 7.6333 | F  | 7.6276 |
| F  | 7.6274 | F  | 7.6369 | F  | 7.6243 |
| Bi | 4.6461 | Bi | 4.6451 | Bi | 4.6355 |
| Bi | 4.6444 | Bi | 4.6772 | Bi | 4.6091 |

---

| atom (6F) | CHARGE |
|-----------|--------|
| C         | 0.9780 |
| C         | 0.9780 |
| F         | 3.8973 |
| F         | 3.8951 |
| F         | 3.8993 |
| F         | 3.8973 |
| F         | 3.8950 |
| F         | 3.8994 |
| Bi        | 7.3306 |
| Bi        | 7.3300 |

---

**The corresponding structural information on POSCAR in our calculations:**

**(a) POSCAR of 0F**

1.000000000

4.7181260097862250 -2.7240113647305648 0.0000000000000000



|                    |                    |                     |
|--------------------|--------------------|---------------------|
| 0.0000000371610732 | 5.4480226650962580 | 0.0000000000000000  |
| 0.0000000000000000 | 0.0000000000000000 | 20.0000000000000000 |

|   |   |    |
|---|---|----|
| H | C | Bi |
| 6 | 2 | 2  |

Direct

|                    |                    |                    |
|--------------------|--------------------|--------------------|
| 0.2193028727447784 | 0.7728810842834658 | 0.6488934572188833 |
| 0.2271189157165347 | 0.4464217884613127 | 0.6488934572188833 |
| 0.5535782115386870 | 0.7806971272552223 | 0.6488934572188833 |
| 0.7806971272552223 | 0.2271189157165347 | 0.3511065427811157 |
| 0.7728810842834658 | 0.5535782115386870 | 0.3511065427811157 |
| 0.4464217884613127 | 0.2193028727447784 | 0.3511065427811157 |
| 0.3333333333333357 | 0.6666666666666643 | 0.6294593440074644 |
| 0.6666666666666643 | 0.3333333333333357 | 0.370540655925351  |
| 0.3333333333333357 | 0.6666666666666643 | 0.5015406473196501 |
| 0.6666666666666643 | 0.3333333333333357 | 0.4984593526803493 |

**(b) POSCAR of 1F**

|                    |                     |                     |
|--------------------|---------------------|---------------------|
| 1.0000000000000000 |                     |                     |
| 4.8090390672149868 | -2.7765000000000040 | -0.0000000000000000 |
| 0.0000000000000000 | 5.5530000000000008  | -0.0000000000000000 |
| 0.0000000000000000 | 0.0000000000000000  | 20.0000000000000000 |

|   |   |   |    |
|---|---|---|----|
| H | C | F | Bi |
| 5 | 2 | 1 | 2  |

Direct

|                    |                    |                    |
|--------------------|--------------------|--------------------|
| 0.5502048785471771 | 0.7549210418996850 | 0.6322300965614502 |
| 0.2228096086498041 | 0.4304856289161094 | 0.6323387927314243 |
| 0.7597760722187559 | 0.2076702897368179 | 0.3592557980366138 |
| 0.4380355562533964 | 0.2115760327561702 | 0.3616130794226819 |
| 0.7637618849130661 | 0.5333789282751553 | 0.3615004235920551 |
| 0.3346683610224161 | 0.6458120230818380 | 0.6139692432161823 |
| 0.6549979171542404 | 0.3165323911189262 | 0.3784098984267601 |
| 0.1990773039391769 | 0.7853572308817718 | 0.6386591396223480 |
| 0.3330599461910779 | 0.6466595231460062 | 0.4973433873008446 |
| 0.6626867552344606 | 0.3093723250014122 | 0.4940186582647144 |

**(c) POSCAR of 2Fa**

|                    |                     |                     |
|--------------------|---------------------|---------------------|
| 1.0000000000000000 |                     |                     |
| 4.7406230603160138 | -2.7370000000000019 | -0.0000000000000000 |
| 0.0000000000000000 | 5.4740000000000002  | -0.0000000000000000 |
| 0.0000000000000000 | 0.0000000000000000  | 20.0000000000000000 |

H C F Bi  
4 2 2 2

Direct

|                    |                    |                    |
|--------------------|--------------------|--------------------|
| 0.2365761051838135 | 0.7887849980052264 | 0.6251886808876270 |
| 0.7800463583919807 | 0.2509648891273764 | 0.3514156031520402 |
| 0.4504320711141268 | 0.2483559096663905 | 0.3511529279938828 |
| 0.7774288222884279 | 0.5779667573844508 | 0.3511673071696360 |
| 0.3432362234174346 | 0.6859861610327681 | 0.6012575565411251 |
| 0.6691722063234761 | 0.3592030187262015 | 0.3689717652051874 |
| 0.2156158538088632 | 0.4098271206909048 | 0.6238440451622211 |
| 0.6198061198894917 | 0.8193317837813664 | 0.6237067153119300 |
| 0.3349434723259901 | 0.6932490939317238 | 0.4834392065447406 |
| 0.6682089693881349 | 0.3599352033148962 | 0.4847687241434264 |

**(d) POSCAR of 2Fb**

1.0000000000000000

|                    |                     |                     |
|--------------------|---------------------|---------------------|
| 4.7774118194687780 | -2.7582400000000029 | 0.0000000000000000  |
| 0.0000000000000000 | 5.5164799999999996  | 0.0000000000000000  |
| 0.0000000000000000 | 0.0000000000000000  | 20.0000000000000000 |

H C F Bi  
4 2 2 2

Direct

|                    |                    |                    |
|--------------------|--------------------|--------------------|
| 0.5533158836036165 | 0.7614535018673294 | 0.6369175528574829 |
| 0.2235234668478014 | 0.4352552395537757 | 0.6369175590639955 |
| 0.4353060594993110 | 0.2163962066383860 | 0.3630824409360045 |
| 0.7650974876331844 | 0.5425954906073969 | 0.3630824471425171 |
| 0.3359535087052379 | 0.6525741259172193 | 0.6186883182790623 |
| 0.6526684343976896 | 0.3252765823415800 | 0.3813116817209377 |
| 0.2003936678669618 | 0.7926635227679242 | 0.6445103922110462 |
| 0.7882282752359657 | 0.1851871854908751 | 0.3554896077889538 |
| 0.3302541032032451 | 0.6584639696514998 | 0.5004558793658305 |
| 0.6583678398996753 | 0.3193867386072995 | 0.4995441206341695 |

**(e) POSCAR of 2Fc**

1.0000000000000000

|                    |                     |                     |
|--------------------|---------------------|---------------------|
| 4.7583765810935947 | -2.7472499999999997 | 0.0000000000000000  |
| 0.0000000000000000 | 5.4945000000000004  | 0.0000000000000000  |
| 0.0000000000000000 | 0.0000000000000000  | 20.0000000000000000 |

H C F Bi  
4 2 2 2

Direct

|                    |                    |                    |
|--------------------|--------------------|--------------------|
| 0.5385221723513354 | 0.7473630425426475 | 0.6267101603058960 |
| 0.1847014078496932 | 0.7809197130023803 | 0.6306927676881423 |
| 0.7974770519600423 | 0.5841781787787209 | 0.3547722420274883 |
| 0.7683086627969304 | 0.1986467696076663 | 0.3581222205159673 |
| 0.3212751945088984 | 0.6362757668932078 | 0.6080633720870947 |
| 0.6566481168522107 | 0.3030809446787586 | 0.3775066990335229 |
| 0.4395918326329863 | 0.1999542569682967 | 0.3587761031871434 |
| 0.2066580345304316 | 0.4205518084687764 | 0.6276167849183211 |
| 0.3215670568264602 | 0.6256851363121786 | 0.4913250149719894 |
| 0.6555470380058331 | 0.2926767438568754 | 0.4942471369923850 |

**(f) POSCAR of 3Fa**

1.0000000000000000

|                    |                     |                     |
|--------------------|---------------------|---------------------|
| 4.7925845845430803 | -2.7670000000000021 | 0.0000000000000000  |
| 0.0000000000000000 | 5.5339999999999989  | 0.0000000000000000  |
| 0.0000000000000000 | 0.0000000000000000  | 20.0000000000000000 |

|   |   |   |    |
|---|---|---|----|
| H | C | F | Bi |
| 3 | 2 | 3 | 2  |

Direct

|                    |                    |                    |
|--------------------|--------------------|--------------------|
| 0.7700578549932970 | 0.2166791059235820 | 0.3529448807784519 |
| 0.4458457586528368 | 0.2172523774899915 | 0.3530421871180280 |
| 0.7706308675353668 | 0.5414651788626088 | 0.3529980676683238 |
| 0.3292722070959471 | 0.6581977941308637 | 0.6033193000957127 |
| 0.6622454952009917 | 0.3251278839927281 | 0.3708719484015077 |
| 0.5941180040293830 | 0.7832680874540046 | 0.6287317450848562 |
| 0.1895961498723935 | 0.3933244560241747 | 0.6287174975023007 |
| 0.2041574685899121 | 0.7978168338314617 | 0.6287941400437447 |
| 0.3292102057388604 | 0.6584198000448964 | 0.4852822347895653 |
| 0.6625435017237464 | 0.3250848684997862 | 0.4867372553669682 |

**(g) POSCAR of 3Fb**

1.0000000000000000

|                    |                     |                     |
|--------------------|---------------------|---------------------|
| 4.7279229709745971 | -2.7296676000000000 | 0.0000000000000000  |
| 0.0000000000000000 | 5.4593351999999999  | 0.0000000000000000  |
| 0.0000000000000000 | 0.0000000000000000  | 20.0000000000000000 |

|   |   |   |    |
|---|---|---|----|
| H | C | F | Bi |
| 3 | 2 | 3 | 2  |

Direct

|                    |                    |                    |
|--------------------|--------------------|--------------------|
| 0.5559756978241107 | 0.7623640897640869 | 0.6370108911530561 |
| 0.2235974984115364 | 0.4322090308489313 | 0.6371313480542417 |
| 0.7685473958122006 | 0.2141789120212845 | 0.3591388902771296 |
| 0.3382676773088059 | 0.6496637016918581 | 0.6174719707521309 |

|                    |                    |                    |
|--------------------|--------------------|--------------------|
| 0.6659759059272748 | 0.3206628067384888 | 0.3839020563917054 |
| 0.3884440745592505 | 0.1926524031345446 | 0.3614101238180116 |
| 0.7988190650713543 | 0.5982037313931883 | 0.3612906398915764 |
| 0.1979854876417685 | 0.7930380048976238 | 0.6401825381860259 |
| 0.3431687482962103 | 0.6437208621375585 | 0.4988529566483209 |
| 0.6767870215261503 | 0.3101297338483664 | 0.5036105939327478 |

**(h) POSCAR of 3Fc**

1.0000000000000000

|                    |                     |                     |
|--------------------|---------------------|---------------------|
| 4.7279229709745971 | -2.7296676000000000 | 0.0000000000000000  |
| 0.0000000000000000 | 5.4593351999999999  | 0.0000000000000000  |
| 0.0000000000000000 | 0.0000000000000000  | 20.0000000000000000 |

|   |   |   |    |
|---|---|---|----|
| H | C | F | Bi |
| 3 | 2 | 3 | 2  |

Direct

|                    |                    |                    |
|--------------------|--------------------|--------------------|
| 0.7627491990958445 | 0.2202321544887291 | 0.3631034704872690 |
| 0.7635111530968776 | 0.5519083548306072 | 0.3629223293431728 |
| 0.2345538936046700 | 0.7680515190685563 | 0.6403755735556692 |
| 0.3382510817661886 | 0.6618859914569796 | 0.6160124804725112 |
| 0.6591622390382771 | 0.3343991321643031 | 0.3825781017028927 |
| 0.6146371987096827 | 0.7893654246986263 | 0.6393123768990325 |
| 0.2041545215957410 | 0.3839396499730085 | 0.6383825858816502 |
| 0.3755568334478286 | 0.1928689766564547 | 0.3598392184062822 |
| 0.3358201463243883 | 0.6737785621917027 | 0.4962675535019093 |
| 0.6691723056991630 | 0.3403935109469567 | 0.5012083188545506 |

**(i) POSCAR of 4Fa**

1.0000000000000000

|                    |                     |                     |
|--------------------|---------------------|---------------------|
| 4.8151012450414754 | -2.7800000000000029 | 0.0000000000000000  |
| 0.0000000000000000 | 5.5599999999999987  | 0.0000000000000000  |
| 0.0000000000000000 | 0.0000000000000000  | 20.0000000000000000 |

|   |   |   |    |
|---|---|---|----|
| H | C | F | Bi |
| 2 | 2 | 4 | 2  |

Direct

|                    |                    |                    |
|--------------------|--------------------|--------------------|
| 0.4418013372045806 | 0.2089960004108775 | 0.3506225080098204 |
| 0.7677566302980239 | 0.5328610853760480 | 0.3504869116834257 |
| 0.3241263233878300 | 0.6568981543020911 | 0.6014905060638966 |
| 0.6550023921960459 | 0.3199498605105120 | 0.3702374363067378 |
| 0.5892382231791444 | 0.7810218401788447 | 0.6259960304741412 |
| 0.1872825109997791 | 0.3922556479616333 | 0.6263404261623862 |
| 0.7933881207337379 | 0.1787037802995286 | 0.3485228599449570 |
| 0.2004879712884247 | 0.7942250549989254 | 0.6284090649715282 |

|                    |                    |                    |
|--------------------|--------------------|--------------------|
| 0.3176048254129995 | 0.6618822337032171 | 0.4833803906224574 |
| 0.6495782760445792 | 0.3264099086945080 | 0.4871107702873729 |

**(j) POSCAR of 4Fb**

1.0000000000000000

|                    |                     |                     |
|--------------------|---------------------|---------------------|
| 4.7756797686612096 | -2.7572399999999999 | 0.0000000000000000  |
| 0.0000000000000000 | 5.5144799999999998  | 0.0000000000000000  |
| 0.0000000000000000 | 0.0000000000000000  | 20.0000000000000000 |

|   |   |   |    |
|---|---|---|----|
| H | C | F | Bi |
| 2 | 2 | 4 | 2  |

Direct

|                    |                    |                    |
|--------------------|--------------------|--------------------|
| 0.7576490289582765 | 0.2311492197297085 | 0.3582084233556202 |
| 0.2390534502838122 | 0.7572107896645903 | 0.6418486953759412 |
| 0.3377796084002611 | 0.6494449755455207 | 0.6168933471073146 |
| 0.6540249537114917 | 0.3341885169219410 | 0.3831101343950749 |
| 0.6123019966585872 | 0.7720571886429539 | 0.6394707330709295 |
| 0.2022501966834724 | 0.3741649524450779 | 0.6392985382649172 |
| 0.3790267948001471 | 0.2045359407723453 | 0.3606099599912653 |
| 0.7827005204928454 | 0.6090731871636166 | 0.3605563159436116 |
| 0.3297564258102526 | 0.6591109132423441 | 0.4971078692954549 |
| 0.6630255965795087 | 0.3258875923478470 | 0.5028979923048098 |

**(k) POSCAR of 4Fc**

1.0000000000000000

|                    |                     |                     |
|--------------------|---------------------|---------------------|
| 4.7192807302651500 | -2.7246780000000026 | 0.0000000000000000  |
| 0.0000000000000000 | 5.4493559999999990  | 0.0000000000000000  |
| 0.0000000000000000 | 0.0000000000000000  | 20.0000000000000000 |

|   |   |   |    |
|---|---|---|----|
| H | C | F | Bi |
| 2 | 2 | 4 | 2  |

Direct

|                    |                    |                    |
|--------------------|--------------------|--------------------|
| 0.4436465595065400 | 0.1995333494177345 | 0.3479152721220444 |
| 0.2038046443850945 | 0.4372138665182419 | 0.6266431852564196 |
| 0.3120824714747812 | 0.6461735319531741 | 0.6020405008472238 |
| 0.6527305724155639 | 0.3042457630524353 | 0.3724816841585721 |
| 0.5907819623106576 | 0.7884876549919682 | 0.6240347537808333 |
| 0.7999757974194850 | 0.5825943288952899 | 0.3503453507854459 |
| 0.8007572602346755 | 0.1741353935753622 | 0.3502196228245680 |
| 0.1874251185441622 | 0.7992223020631428 | 0.6243944504944565 |
| 0.3010097399302509 | 0.6273399038472292 | 0.4839560953155129 |
| 0.6340524845239344 | 0.2942574721216289 | 0.4905659889416683 |

**(l) POSCAR of 5F**



1.0000000000000000  
 4.7756797686612096 -2.7572399999999999 0.0000000000000000  
 0.0000000000000000 5.5144799999999998 0.0000000000000000  
 0.0000000000000000 0.0000000000000000 20.0000000000000000

H C F Bi  
 1 2 5 2

Direct

0.7619632551622146 0.2239898318948548 0.3567260719362153  
 0.3374408834260620 0.6497417168979922 0.6157241293705340  
 0.6606713891244311 0.3269409830228938 0.3827803243729235  
 0.6029809204056420 0.7821496291232535 0.6417777483232072  
 0.2031381048292999 0.3842532789999993 0.6418033723421459  
 0.3847448277126588 0.2000164928457977 0.3608567373843030  
 0.7901836212203435 0.6030955478779276 0.3609374099410232  
 0.2051191833686801 0.7840535532800814 0.6411469592190713  
 0.3390153289237148 0.6479230081584291 0.4956679392095324  
 0.6723110582056080 0.3146592343747159 0.5025813170059976

**(m) POSCAR of 6F**

1.0000000000000000  
 4.7798477635464440 -2.7596463929689681 0.0000000000000000  
 0.0000000000000000 5.5192927859379397 0.0000000000000000  
 0.0000000000000001 0.0000000000000000 20.0000000000000000

C F Bi  
 2 6 2

Direct

0.3333333333333357 0.6666666666666643 0.6296988706586149  
 0.6666666666666643 0.3333333333333357 0.3703011293413851  
 0.2004508646648802 0.7995491353351198 0.6586379599965966  
 0.2004508646648802 0.4009017293297603 0.6586379599965966  
 0.5990982706702397 0.7995491353351198 0.6586379599965966  
 0.7995491353351198 0.2004508646648802 0.3413620400034034  
 0.4009017293297603 0.2004508646648802 0.3413620400034034  
 0.7995491353351198 0.5990982706702397 0.3413620400034034  
 0.3333333333333357 0.6666666666666643 0.4953262227995268  
 0.6666666666666643 0.3333333333333357 0.5046737772004732

**References**

1. A. Alexandradinata, X. Dai and B. A. Bernevig, *Physical Review B*, 2012, **89**, 1249-1262.
2. R. Yu, X. L. Qi, A. Bernevig, Z. Fang and X. Dai, *Physical Review B*, 2011, **84**, 2250-2262.
